# Supplementary material for: Implementation of Flipped Classroom Case Learning in Diagnostic Microbiology curriculum
Source: Research Square preprint supplement (doi:10.21203/rs.3.rs-7783031/v1), 2025-11-28
Supplement: Supplementary file 1 [file 9eb898704e35bff5471c4239.pdf]

## Diagnostic Microbiology curriculum Evaluation

### PART I:

1. Name: \_\_\_\_\_

2. Class time: \_\_\_\_\_

3. Group: \_\_\_\_\_

4. School: \_\_\_\_\_

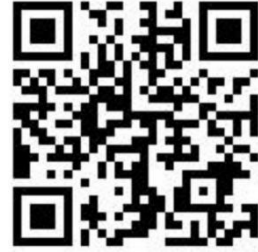

**PART II:** You are kindly requested to provide an evaluation based on the following scoring system. Utilize a **100-point scale (0-100)** for your assessment. Scores should directly correlate with the positivity of your evaluation. We appreciate your objective and candid feedback.

**1. The curriculum has deepened my interest in academic learning.**

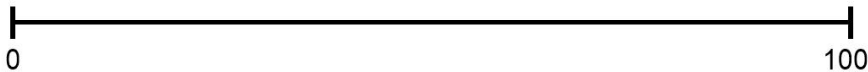

**2. The curriculum improved my understanding of key key concepts and broadened my expertise.**

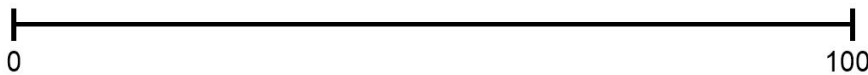

**3. The curriculum enhanced my clinical reasoning skills.**

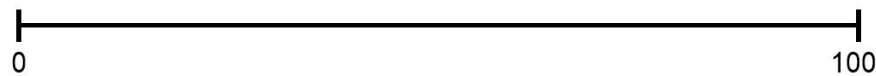

**4. The curriculum improved teamwork and communication skills.**

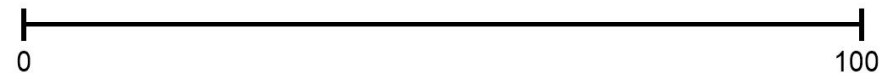

**5. The curriculum strengthened my ability to solve problems independently.**

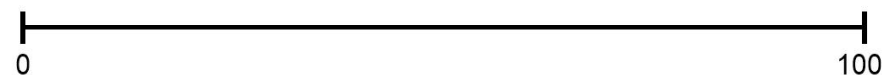

**6. The curriculum developed my case analysis skills.**

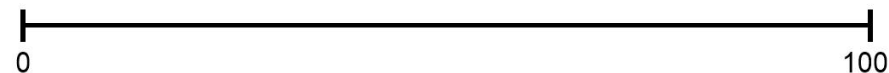

**7. The curriculum applied textbook theory to clinical practice.**

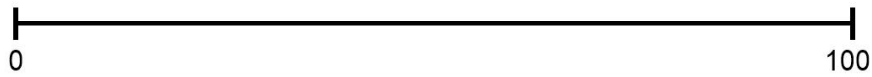

**8. The curriculum emphasized communication between clinical and laboratory teams.**

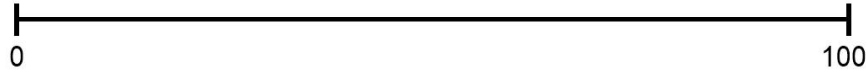

**9. The curriculum highlighted the value of interdisciplinary approaches in diagnosing and treating disease.**

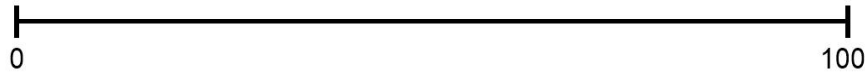

**10. This curriculum be beneficial for my future clinical studies.**

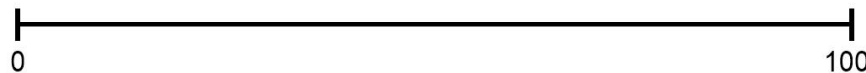

**11. The curriculum demonstrated how drug sensitivity reports guide clinical diagnosis and treatment.**

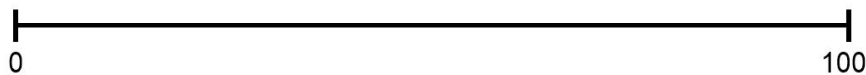

**12. The curriculum improved interaction between students and teachers.**

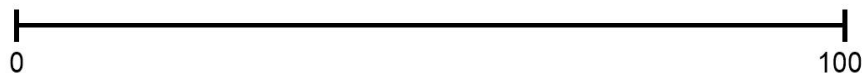

**13. The teaching preparation for the curriculum was adequate.**

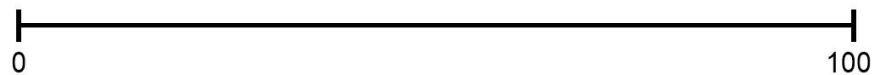

**14. Teaching time was allocated reasonably.**

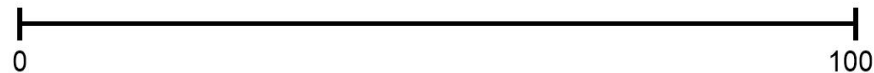

**15. The quality of instruction was high.**

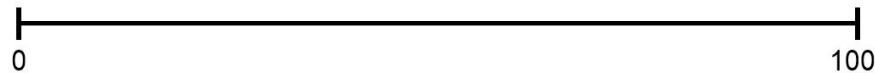

**16. Overall satisfaction with the teaching session.**

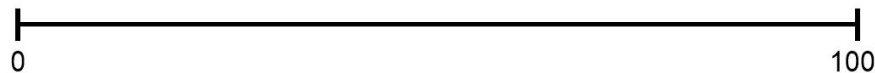

**17. We welcome your valuable suggestions to enhance our teaching approach.**

---

---

---
